# Supplementary material for: Evaluation of the Fill-it-up-design to use historical control data in randomized clinical trials with two arm parallel group design
Source: PubMed Central journal article supplement (PMC11382532; doi:10.1186/s12874-024-02306-2), 2024-09-09
Supplement: 12874_2024_2306_MOESM1_ESM.pdf [file 12874_2024_2306_MOESM1_ESM.pdf]

## Appendix A Optimization and Covariances

$$\begin{aligned} \frac{d}{d\omega} \left( \frac{\omega^2}{n_H} + \frac{(1-\omega)^2}{n_C} \right) &= \frac{2\omega}{n_H} - \frac{2}{n_C} + \frac{2\omega}{n_C} = 2\omega \left( \frac{1}{n_H} + \frac{1}{n_C} \right) - \frac{2}{n_C} = 0 \\ \rightarrow \omega^* &= \frac{n_H}{n_H + n_C} \end{aligned} \quad (\text{A1})$$

$$\begin{aligned} \text{Cov}(Z_{S_1}^*, Z_{Ept}) &= \text{Cov} \left( \frac{\bar{y}_E - (\omega^* \bar{y}_H + (1-\omega^*) \bar{y}_C)}{\sqrt{\frac{1}{n_E} + \frac{1}{n_C + n_H}}}, \frac{|\bar{y}_C - \bar{y}_H| - \Delta}{\sqrt{\frac{1}{n_H} + \frac{1}{n_C}}} \right) \\ &= \frac{1}{\sqrt{\frac{1}{n_E} + \frac{1}{n_C + n_H}} \sqrt{\frac{1}{n_H} + \frac{1}{n_C}}} \\ &\quad \cdot \text{Cov}(\bar{y}_E - (\omega^* \bar{y}_H + (1-\omega^*) \bar{y}_C), |\bar{y}_C - \bar{y}_H| - \Delta) \\ &= \sqrt{\frac{n_E n_C n_H}{n_C + n_H + n_E}} \left( -\frac{\omega^*}{n_H} + \frac{1-\omega^*}{n_C} \right) = 0. \end{aligned} \quad (\text{A2})$$

$$\begin{aligned} \text{Cov}(Z_{S_2}, Z_{Ept}) &= \text{Cov} \left( \frac{\bar{y}'_E - \bar{y}'_C}{\sqrt{\frac{1}{n_E + n'_E} + \frac{1}{n_C + n'_C}}}, \frac{|\bar{y}_C - \bar{y}_H| - \Delta}{\sqrt{\frac{1}{n_H} + \frac{1}{n_C}}} \right) \\ &= \sqrt{\frac{(n_E + n'_E)(n_C + n'_C)n_C n_H}{((n_C + n'_C) + (n_E + n'_E))(n_C + n_H)}} (\text{Cov}(\bar{y}_C, \bar{y}'_C)) \\ &= \sqrt{\frac{(n_E + n'_E)(n_C + n'_C)n_C n_H}{((n_C + n'_C) + (n_E + n'_E))(n_C + n_H)}} \left( \frac{n_C}{(n_C + n'_C)n_C} \right) \\ &= \sqrt{\frac{(n_E + n'_E)n_C n_H}{((n_C + n'_C) + (n_E + n'_E))(n_C + n_H)}}. \end{aligned} \quad (\text{A3})$$

## Appendix B Derivation of Family wise error rate

The first component of the family wise error rate (FWER) of the family of hypothesis  $H_0^{Ept}, H_0^{S_1}, H_0^{S_2}$  can be calculated from

$$\begin{aligned} \alpha_{Ept, S_1} &= \int_{z_{1-\alpha_{S_1}}}^{\infty} \int_{-\infty}^{-z_{1-\frac{\alpha_{Ept}}{2}}} f_{(Z_{Ept}, Z_{S_1})} dz_{Ept} dz_{S_1} \\ &+ \int_{z_{1-\alpha_{S_1}}}^{\infty} \int_{z_{1-\frac{\alpha_{Ept}}{2}}}^{\infty} f_{(Z_{Ept}, Z_{S_1})} dz_{Ept} dz_{S_1}. \end{aligned} \quad (B1)$$

In the special case where  $\omega = \omega^*$ , since  $Z_{Ept}$  and  $Z_{S_1}^*$  are uncorrelated,  $f_{(Z_{Ept}, Z_{S_1})}$  is obtained as the product of normal densities by

$$\begin{aligned} f_{(Z_{Ept}, Z_{S_1})} &:= \phi\left(\frac{z_{Ept} - \mu_{Ept}}{\sigma_{Ept}}\right) \cdot \phi\left(\frac{z_{S_1}^* - \mu_{S_1}^*}{\sigma_{S_1}^*}\right) \\ &= \frac{1}{\sqrt{2\pi}} \exp\left(-\frac{1}{2} \left(z_{Ept} - \frac{|\mu_C - \mu_H| - \Delta}{\sqrt{\frac{1}{n_C} + \frac{1}{n_H}}}\right)^2\right) \\ &\quad \cdot \frac{1}{\sqrt{2\pi}} \exp\left(-\frac{1}{2} \left(z_{S_1} - \frac{\mu_E - (\omega\mu_H + (1-\omega)\mu_C)}{\sqrt{\frac{1}{n_E} + \frac{\omega^2}{n_H} + \frac{(1-\omega)^2}{n_C}}}\right)^2\right). \end{aligned}$$

The second component of the family wise error rate  $\alpha_{Ept^c, S_2}$  is the joint rejection probability of the superiority test ( $S_2$ ) and the non-rejected equivalence pre-test. This can be calculated from

$$\alpha_{Ept^c, S_2} = \int_{z_{1-\alpha_{S_2}}}^{\infty} \int_{-z_{1-\frac{\alpha_{Ept}}{2}}}^{z_{1-\frac{\alpha_{Ept}}{2}}} f_{(Z_{Ept}, Z_{S_2})} dz_{Ept} dz_{S_2}, \quad (B2)$$

where  $f_{(Z_{Ept}, Z_{S_2})}$  is a bivariate normal density with mean

$$\boldsymbol{\mu}_{Ept, S_2} := \begin{bmatrix} \frac{|\mu_C - \mu_H| - \Delta}{\sqrt{\frac{1}{n_C} + \frac{1}{n_H}}} \\ \frac{\mu_E - \mu_C}{\sqrt{\frac{1}{n_E + n'_E} + \frac{1}{n_C + n'_C}}} \end{bmatrix}$$

and covariance

$$\boldsymbol{\Sigma}_{Ept, S_2} := \begin{bmatrix} 1 & \sqrt{\frac{(n_E + n'_E)n_C n_H}{((n_C + n'_C) + (n_E + n'_E))(n_C + n'_C)(n_C + n_H)}} \\ \sqrt{\frac{(n_E + n'_E)n_C n_H}{((n_C + n'_C) + (n_E + n'_E))(n_C + n'_C)(n_C + n_H)}} & 1 \end{bmatrix}$$

obtained by

$$f_{(Z_{Ept}, Z_{S_2})} := \frac{\exp\left(-\frac{1}{2}\left(\begin{bmatrix} z_{Ept} \\ z_{S_2} \end{bmatrix} - \boldsymbol{\mu}_{Ept, S_2}\right)^T \boldsymbol{\Sigma}_{Ept, S_2}^{-1} \left(\begin{bmatrix} z_{Ept} \\ z_{S_2} \end{bmatrix} - \boldsymbol{\mu}_{Ept, S_2}\right)\right)}{\sqrt{(2\pi)^2 \det(\boldsymbol{\Sigma}_{Ept, S_2})}}.$$

## Appendix C Family wise error rate for small and large treatment effects

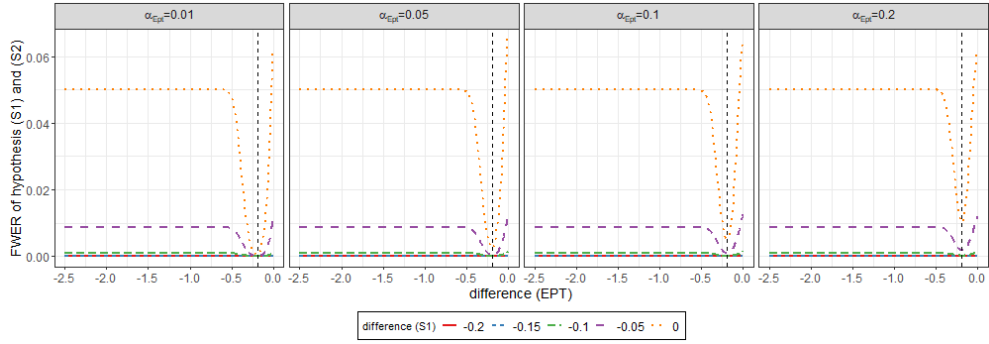

**Fig. C1** Family wise error rate testing simultaneously superiority tests ( $S_1$ ) and ( $S_2$ ) for different scenarios of the Fill-it-up-design depending on the choice of the significance level of the equivalence pre-test. A small effect size  $\delta = 0.2$  with  $n_H = 500$  historical controls and an equivalence margin of  $\Delta = 0.19$  is examined.

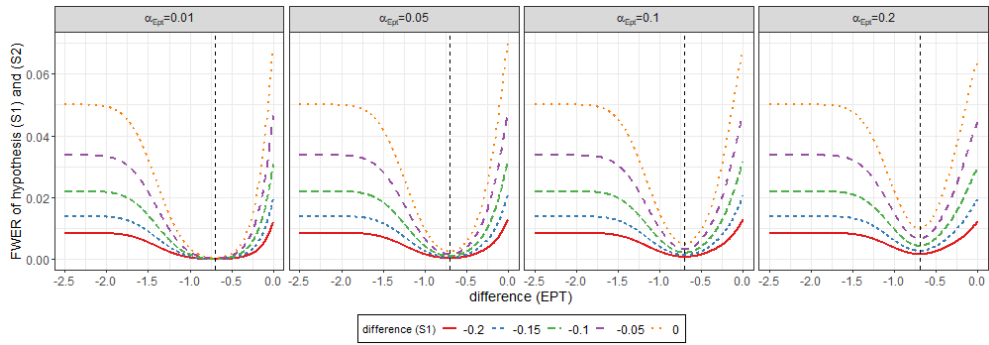

**Fig. C2** Family wise error rate testing simultaneously superiority tests ( $S_1$ ) and ( $S_2$ ) for different scenarios of the Fill-it-up-design depending on the choice of the significance level of the equivalence pre-test. A large effect size  $\delta = 0.8$  with  $n_H = 500$  historical controls and an equivalence margin of  $\Delta = 0.70$  is examined.

## Appendix D Derivation of Power

$\beta_{E_{pt},S_1}$  is the type II error probability for detecting equivalence in the pre-test without proving the difference in the superiority test ( $S_1$ ) and is obtained by

$$\begin{aligned} \beta_{E_{pt},S_1} = & \int_{-\infty}^{z_{1-\alpha_{S_1}}} \int_{-\infty}^{-z_{1-\frac{\alpha_{E_{pt}}}{2}}} f_{(Z_{E_{pt}},Z_{S_1})} dz_{E_{pt}} dz_{S_1} \\ & + \int_{-\infty}^{z_{1-\alpha_{S_1}}} \int_{z_{1-\frac{\alpha_{E_{pt}}}{2}}}^{\infty} f_{(Z_{E_{pt}},Z_{S_1})} dz_{E_{pt}} dz_{S_1}. \end{aligned} \quad (D1)$$

Respectively  $\beta_{E_{pt}^c,S_2}$  is the type II error probability for not detecting equivalence in the equivalence pre-test and not proving the difference and is obtained by

$$\beta_{E_{pt}^c,S_2} = \int_{-\infty}^{z_{1-\alpha_{S_2}}} \int_{-z_{1-\frac{\alpha_{E_{pt}}}{2}}}^{z_{1-\frac{\alpha_{E_{pt}}}{2}}} f_{(Z_{E_{pt}},Z_{S_2})} dz_{E_{pt}} dz_{S_2}. \quad (D2)$$

## Appendix E Power and sample sizes for small and large treatment effects

**Table E1** Overall power and sample sizes for different scenarios of the Fill-it-up-design depending on the choice of the equivalence margin  $\Delta$  considering a small effect size  $\delta = 0.2$  including  $n_H = 500$  historical controls and significance levels  $\alpha_{S_1} = \alpha_{S_2} = 0.05$ .

| $\alpha_{Ept}$ | $\Delta$ | $N_{FIU}$ | $\gamma N_{FIU}$ | $AVN$ | $1 - \beta_{S_1}$<br>$= 1 - \beta_{S_2}$ | $1 - \beta_{Ept,S_1}$ | $1 - \beta_{Ept^c,S_2}$ | $1 - \beta_{FIU}$ |
|----------------|----------|-----------|------------------|-------|------------------------------------------|-----------------------|-------------------------|-------------------|
| 0.01           | 0.1946   | 620       | 400              | 618   | 0.80                                     | 0.9694                | 0.8310                  | 0.8004            |
| 0.01           | 0.1973   | 620       | 400              | 618   | 0.80                                     | 0.9674                | 0.8327                  | 0.8001            |
| 0.05           | 0.1376   | 620       | 400              | 610   | 0.80                                     | 0.9545                | 0.8488                  | 0.8033            |
| 0.05           | 0.1680   | 638       | 414              | 628   | 0.81                                     | 0.9539                | 0.8464                  | 0.8004            |
| 0.10           | 0.1049   | 656       | 426              | 634   | 0.82                                     | 0.9508                | 0.8511                  | 0.8019            |
| 0.10           | 0.1485   | 796       | 538              | 772   | 0.88                                     | 0.9405                | 0.8598                  | 0.8004            |
| 0.20           | 0.0696   | 638       | 414              | 594   | 0.81                                     | 0.9289                | 0.8747                  | 0.8036            |
| 0.20           | 0.1340   | 676       | 442              | 630   | 0.83                                     | 0.8808                | 0.9193                  | 0.8001            |

$\alpha_{Ept}$ : Two-sided significance level of equivalence pre-test,  $N_{FIU}$ : Maximum sample size of the Fill-it-up-design,  $\gamma N_{FIU}$ : Sample size of the first stage of the Fill-it-up-design,  $\beta_{S_1}$ : Type II Error Probability superiority test ( $S_1$ ),  $\beta_{Ept,S_1}$ : Type II Error Probability of equivalence pre-test and superiority test ( $S_1$ ),  $\beta_{Ept^c,S_2}$ : Type II Error Probability of equivalence pre-test and superiority test ( $S_2$ ),  $1 - \beta_{FIU}$ : Power of the Fill-it-up-design.

**Table E2** Overall power and sample sizes for different scenarios of the Fill-it-up-design depending on the choice of the equivalence margin  $\Delta$  considering a large effect size  $\delta = 0.8$  including  $n_H = 500$  historical controls and significance levels  $\alpha_{S_1} = \alpha_{S_2} = 0.05$ .

| $\alpha_{Ept}$ | $\Delta$ | $N_{FIU}$ | $\gamma N_{FIU}$ | $AVN$ | $1 - \beta_{S_1}$<br>$= 1 - \beta_{S_2}$ | $1 - \beta_{Ept,S_1}$ | $1 - \beta_{Ept^c,S_2}$ | $1 - \beta_{FIU}$ |
|----------------|----------|-----------|------------------|-------|------------------------------------------|-----------------------|-------------------------|-------------------|
| 0.01           | 0.6796   | 44        | 24               | 44    | 0.83                                     | 0.9973                | 0.8032                  | 0.8005            |
| 0.01           | 0.7152   | 54        | 28               | 54    | 0.90                                     | 0.9902                | 0.8102                  | 0.8004            |
| 0.05           | 0.4805   | 46        | 24               | 46    | 0.85                                     | 0.9628                | 0.8376                  | 0.8004            |
| 0.05           | 0.6229   | 54        | 28               | 54    | 0.90                                     | 0.8566                | 0.9436                  | 0.8002            |
| 0.10           | 0.3906   | 40        | 22               | 40    | 0.80                                     | 0.9979                | 0.8021                  | 0.8000            |
| 0.10           | 0.5800   | 48        | 26               | 46    | 0.86                                     | 0.8576                | 0.9425                  | 0.8002            |
| 0.20           | 0.2364   | 50        | 26               | 46    | 0.88                                     | 0.9202                | 0.8818                  | 0.8020            |
| 0.20           | 0.5182   | 48        | 26               | 44    | 0.86                                     | 0.8368                | 0.9632                  | 0.8000            |

$\alpha_{Ept}$ : Two-sided significance level of equivalence pre-test,  $N_{FIU}$ : Maximum sample size of the Fill-it-up-design,  $\gamma N_{FIU}$ : Sample size of the first stage of the Fill-it-up-design,  $\beta_{S_1}$ : Type II Error Probability superiority test ( $S_1$ ),  $\beta_{Ept,S_1}$ : Type II Error Probability of equivalence pre-test and superiority test ( $S_1$ ),  $\beta_{Ept^c,S_2}$ : Type II Error Probability of equivalence pre-test and superiority test ( $S_2$ ),  $1 - \beta_{FIU}$ : Power of the Fill-it-up-design.

## Appendix F Evaluation of MAP approach

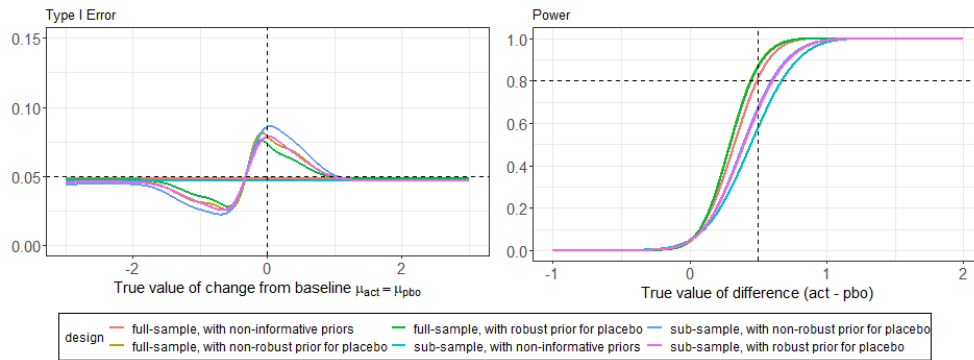

**Fig. F1** Evaluation of Type I Error and Power for MAP approach for full-sample and sub-sample using non-informative, non-robust and robust priors and truncated normal distribution for heterogeneity.

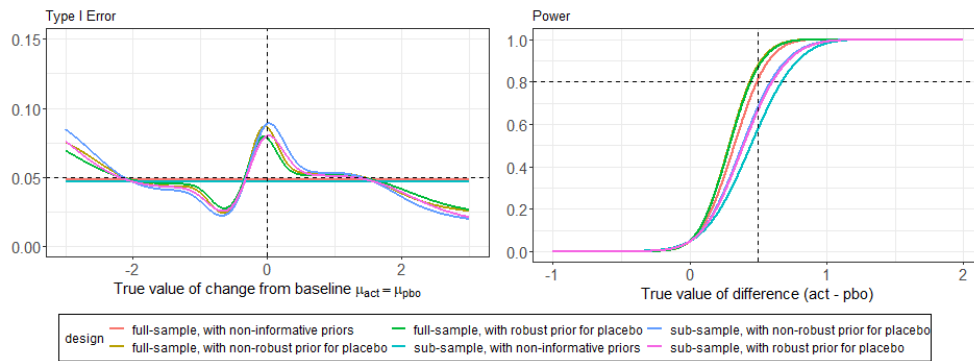

**Fig. F2** Evaluation of Type I Error and Power for MAP approach for full-sample and sub-sample using non-informative, non-robust and robust priors and truncated cauchy distribution for heterogeneity.
